# Supplementary material for: The role of Drosophila mismatch repair in suppressing recombination between diverged sequences
Source: PubMed Central journal article supplement (PMC4663472; doi:10.1038/srep17601), 2015-11-30
Supplement: srep17601-s1.pdf [file srep17601-s1.pdf]

## **Supplementary Information**

### **The role of *Drosophila* mismatch repair in suppressing recombination between diverged sequences**

Anthony T. Do and Jeannine R. LaRocque

**Supplementary Table S1– Total Flies Scored for Each DSB Repair Phenotype**

| Genotype                   | DSB repair assay    | Experiment number | No. Progeny (No. of individual germlines) | Total number of each phenotype (% of total) |                            |                   |
|----------------------------|---------------------|-------------------|-------------------------------------------|---------------------------------------------|----------------------------|-------------------|
|                            |                     |                   |                                           | y+ w– NHEJ, intersister HR, no DSB          | y+ w+ intra-chromosomal HR | y–w– SSA          |
| <i>msh6</i> <sup>+/+</sup> | DR- <i>white</i>    | 1                 | 284 (11)                                  | 184 (64.8)                                  | 94 (33.1)                  | 6 (2.11)          |
|                            |                     | 2                 | 282 (13)                                  | 168 (59.6)                                  | 106 (37.6)                 | 8 (2.84)          |
|                            |                     | 3                 | 73 (3)                                    | 41 (56.2)                                   | 32 (43.8)                  | 0 (0.00)          |
|                            |                     | 4                 | 127 (8)                                   | 69 (54.3)                                   | 57 (44.9)                  | 1 (0.787)         |
|                            |                     | 5                 | 1157 (13)                                 | 729 (63.0)                                  | 414 (35.8)                 | 14 (1.21)         |
|                            |                     | <b>Total</b>      | <b>1923 (48)</b>                          | <b>1191 (61.9)</b>                          | <b>703 (36.6)</b>          | <b>29 (1.51)</b>  |
|                            |                     | <b>Mean %</b>     |                                           | <b>59.6</b>                                 | <b>39.0</b>                | <b>1.43</b>       |
|                            |                     | <b>(±S.E.M.)</b>  |                                           | <b>(±1.98)</b>                              | <b>(±2.29)</b>             | <b>(±0.496)</b>   |
|                            | DR- <i>white.mu</i> | 1                 | 268 (12)                                  | 206 (76.9)                                  | 58 (21.6)                  | 4 (1.49)          |
|                            |                     | 2                 | 153 (10)                                  | 112 (73.2)                                  | 38 (24.8)                  | 3 (1.96)          |
|                            |                     | 3                 | 106 (4)                                   | 77 (72.6)                                   | 28 (26.4)                  | 1 (0.943)         |
|                            |                     | 4                 | 117 (7)                                   | 84 (71.8)                                   | 33 (28.2)                  | 0 (0.00)          |
|                            |                     | 5                 | 1092 (13)                                 | 813 (74.5)                                  | 271 (24.8)                 | 8 (0.733)         |
|                            |                     | <b>Total</b>      | <b>1736 (46)</b>                          | <b>1292 (74.4)</b>                          | <b>428 (24.7)</b>          | <b>16 (0.922)</b> |
|                            | <b>Mean %</b>       |                   | <b>73.8</b>                               | <b>25.2</b>                                 | <b>1.03</b>                |                   |
|                            | <b>(±S.E.M.)</b>    |                   | <b>(±0.892)</b>                           | <b>(±1.09)</b>                              | <b>(±0.334)</b>            |                   |
| <i>msh6</i> <sup>-/-</sup> | DR- <i>white</i>    | 1                 | 113 (4)                                   | 68 (60.2)                                   | 44 (38.9)                  | 1 (0.885)         |
|                            |                     | 2                 | 275 (7)                                   | 137 (49.8)                                  | 136 (49.5)                 | 2 (0.727)         |
|                            |                     | 3                 | 48 (3)                                    | 35 (72.9)                                   | 12 (25.0)                  | 1 (2.08)          |
|                            |                     | 4                 | 93 (8)                                    | 66 (71.0)                                   | 27 (29.0)                  | 0 (0.00)          |
|                            |                     | 5                 | 116 (5)                                   | 69 (61.1)                                   | 42 (37.2)                  | 5 (1.77)          |
|                            |                     | <b>Total</b>      | <b>645 (27)</b>                           | <b>375 (58.4)</b>                           | <b>261 (40.7)</b>          | <b>9 (1.40)</b>   |
|                            |                     | <b>Mean %</b>     |                                           | <b>63.0</b>                                 | <b>27.6</b>                | <b>1.23</b>       |
|                            |                     | <b>(±S.E.M.)</b>  |                                           | <b>(±4.17)</b>                              | <b>(±2.62)</b>             | <b>(±0.353)</b>   |
|                            | DR- <i>white.mu</i> | 1                 | 361 (16)                                  | 254 (70.4)                                  | 101 (28.0)                 | 6 (1.66)          |
|                            |                     | 2                 | 273 (9)                                   | 145 (53.1)                                  | 123 (45.1)                 | 5 (1.83)          |
|                            |                     | 3                 | 11 (2)                                    | 11 (100)                                    | 0 (0.00)                   | 0 (0.00)          |
|                            |                     | 4                 | 63 (6)                                    | 42 (66.7)                                   | 21 (33.3)                  | 0 (0.00)          |
|                            |                     | 5                 | 113 (5)                                   | 74 (65.5)                                   | 37 (32.7)                  | 2 (1.77)          |
|                            |                     | <b>Total</b>      | <b>821 (38)</b>                           | <b>526 (63.8)</b>                           | <b>282 (34.3)</b>          | <b>13 (1.55)</b>  |
|                            | <b>Mean %</b>       |                   | <b>71.1</b>                               | <b>27.8</b>                                 | <b>1.05</b>                |                   |
|                            | <b>(±S.E.M.)</b>    |                   | <b>(±7.78)</b>                            | <b>(±7.50)</b>                              | <b>(±0.430)</b>            |                   |

**Supplementary Table S2 – Frequency of Nonhomologous End-Joining Events**

| DSB repair assay    | Genotype                   | Experiment number | No. y+w- isolates analyzed | No. NHEJ with processing (%) |
|---------------------|----------------------------|-------------------|----------------------------|------------------------------|
| DR- <i>white</i>    | <i>msh6</i> <sup>-/+</sup> | 1                 | 3                          | 0 (0)                        |
|                     |                            | 2                 | 13                         | 1 (7.69)                     |
|                     |                            | 3                 | 11                         | 0 (0)                        |
|                     |                            | 4                 | 9                          | 0 (0)                        |
|                     |                            | 5                 | 25                         | 2 (8.00)                     |
|                     |                            | <b>Total</b>      | <b>61</b>                  | <b>3 (4.92)</b>              |
|                     | <i>msh6</i> <sup>-/-</sup> | 1                 | 0                          | 0 (0)                        |
|                     |                            | 2                 | 7                          | 0 (0)                        |
|                     |                            | 3                 | 6                          | 2 (33.3)                     |
|                     |                            | 4                 | 12                         | 1 (8.33)                     |
|                     |                            | 5                 | 10                         | 0 (0)                        |
| <b>Total</b>        |                            | <b>35</b>         | <b>3 (8.57)</b>            |                              |
| DR- <i>white.mu</i> | <i>msh6</i> <sup>-/+</sup> | 1                 | 2                          | 1 (50)                       |
|                     |                            | 2                 | 11                         | 0 (0)                        |
|                     |                            | 3                 | 5                          | 0 (0)                        |
|                     |                            | 4                 | 11                         | 0 (0)                        |
|                     |                            | 5                 | 26                         | 2 (7.69)                     |
|                     |                            | <b>Total</b>      | <b>55</b>                  | <b>3 (5.45)</b>              |
|                     | <i>msh6</i> <sup>-/-</sup> | 1                 | 14                         | 1 (7.14)                     |
|                     |                            | 2                 | 10                         | 1 (10)                       |
|                     |                            | 3                 | 1                          | 0 (0)                        |
|                     |                            | 4                 | 7                          | 0 (0)                        |
|                     |                            | 5                 | 10                         | 0 (0)                        |
| <b>Total</b>        |                            | <b>42</b>         | <b>2 (4.76)</b>            |                              |
